# Supplementary material
Source: HighWire-hosted journal article supplement (https://ajnr-sso.highwirestaging.com/highwire/filestream/73343/field_highwire_adjunct_files/0/19-01003.pdf)
Supplement: 19-01003.pdf [file 19-01003.pdf]

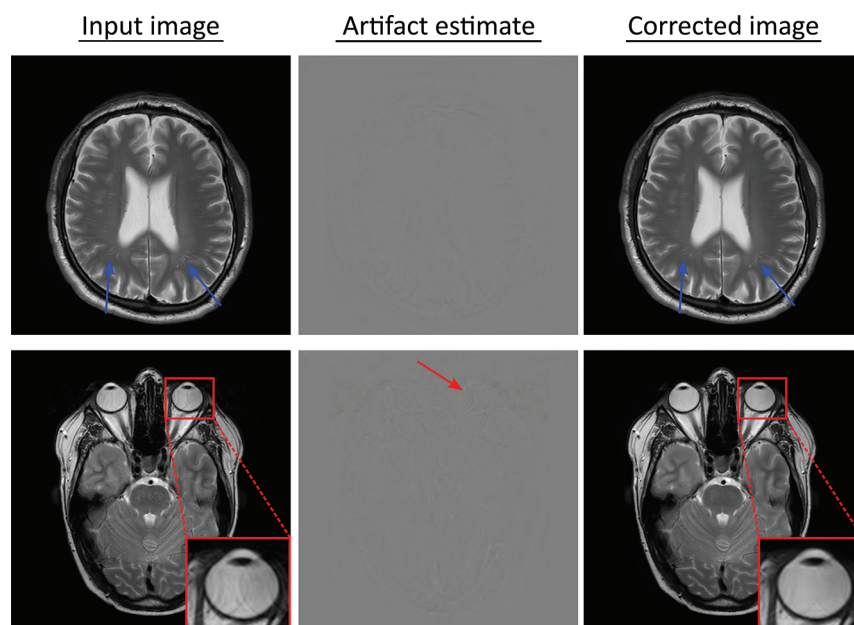

**ON LINE FIGURE.** Examples of the network performance for images that were rated as artifact-free by the radiologists. *Upper row:* an example without visible motion artifacts in the input image. The artifact estimate shows only minor structural modifications, which are not noticeable in the corrected image. Fine image details (*blue arrows*) are retained after correction. *Lower row:* an example where mild motion artifacts are present in the eye region, even though the image was rated as artifact-free (readers generally ignored eye/globe motion). The network largely eliminated these artifacts (*red arrow*, inset figures).
